# Supplementary material for: Plant Polyphenol Gossypol Induced Cell Death and Its Association with Gene Expression in Mouse Macrophages
Source: MDPI journal article supplement (doi:10.3390/biom13040624), 2023-03-30
Supplement: s1 [file s1]

## Supplementary

Table S1. Sequence Information of qPCR Primers.

| mRNA                     | accession no.    | amplicon (bp) | forward primer (5' to 3')       | reverse primer (5' to 3')        |
|--------------------------|------------------|---------------|---------------------------------|----------------------------------|
| <b>TTP family</b>        |                  |               |                                 |                                  |
| Ttp/Zfp36/Tis1<br>1      | NM_011756        | 70            | GGTACCCCAGGCTGGCTTT             | ACCTGTAACCCCAGAACTTGGA           |
| Zfp36l1/Tis11b           | NM_007564        | 60            | TGCGAACGCCCACGAT                | CTTCGCTCAAGTCAAAAATGG            |
| Zfp36l2/Tis11d           | NM_0010018<br>06 | 77            | GAGGGCACCTCCCAACCT              | TGACAGAAAGTGTGGTCGACATT          |
| Zfp36l3                  | NM_0010095<br>49 | 70            | CGAACTGCGTACCCTGTCAAG           | GCCAACGCTGTGGAAGGT               |
| <b>Cytokines</b>         |                  |               |                                 |                                  |
| Gm-csf/Csf2              | NM_009969        | 71            | CACCCGCTCACCCATCAC              | GGAGGTTCAAGGGCTTCTTTGA           |
| Cox2/Ptgs2               | NM_011198        | 106           | CCACCTCTGCGATGCTCTTC            | CATTCCCCACGGTTTTGACATG           |
| Ifn $\gamma$             | NM_008337        | 81            | TGGCATAGATGTGGAAGAAAAGAG        | TGCAGGATTTTCATGTCACCAT           |
| Il12b                    | NM_008352        | 79            | GACCAGAGACATGGAGTCATAGG         | TGTACTGGCCAGCATCTAGAAACT         |
| Tnf/Tnf $\alpha$         | NM_013693        | 74            | GCTGTCGCTACATCACTGAACCT         | TGACCCGTAGGGCAATTACA             |
| <b>GLUT family</b>       |                  |               |                                 |                                  |
| Glut1 (Slc2a1)           | M13979           | 123           | CGTGCTTATGGGTTTCTCCAAA          | GACACCTCCCCCACATACATG            |
| Glut2 (Slc2a2)           | NM_012879        | 80            | TTTGCACTAGGCGGAATGG             | GCCAACATGGCTTTGATCCTT            |
| Glut3 (Slc2a3)           | NM_017102        | 112           | TGAAGCCATGAGCTTTGTCTGT          | GCCCTGGCTGAAGAGTTCAG             |
| Glut4 (Slc2a4)           | NM_012751        | 87            | CAACTGGACCTGTAACCTTCATCGT       | ACGGCAAATAGAAGGAAGACGTA          |
| <b>Insulin signaling</b> |                  |               |                                 |                                  |
| Insr                     | NM_017071        | 137           | CAAAAGCACAATCAGAGTGAGTAT<br>GAC | ACCACGTTGTGCAGGTAATCC            |
| Akt1/Pkb                 | NM_033230        | 90            | TGGACTACTTGCACTCCGAGAA          | TTATCTTGATATGCCCGTCCTT           |
| GSK3 $\beta$             | NM_032080        | 106           | TTAAGGAAGGAAAAGGTGAATCGA        | CCAAAAGCTGAAGGCTGCTG             |
| Pik3r1                   | NM_013005        | 118           | CCTCTCCTTATAAAGCTCCTGGAA        | GATCACAATCAAGAAGCTGTCGTA<br>A    |
| <b>Other mRNA</b>        |                  |               |                                 |                                  |
| App                      | NM_007471        | 70            | GTTGCCTAGTTGGTGAGTTTGT          | TCCTGGTGTAGGAACTTGCACTTG         |
| Lepr                     | NM_146146        | 92            | TGACCAGTGTAACAGTGCTAACTTC<br>TC | CATATTTAACTGAGGGTTGTCTCTG<br>ACA |
| Rpl32<br>(reference)     | NM_172086        | 66            | AACCGAAAAGCCATTGTAGAAA          | CCTGGCGTTGGGATTGG                |
